# Supplementary material
Source: PubMed Central journal article supplement (PMC8019245)
Supplement: mmc1.pdf [file mmc1.pdf]

## Supplementary Information

### Reviving chloroquine for anti- SARS-CoV-2 treatment with Cucurbit[7]uril-based supramolecular formulation

Cheryl H. T. Kwong<sup>a,1</sup>, Jingfang Mu<sup>b,1</sup>, Shengke Li<sup>a</sup>, Yaohui Fang<sup>b</sup>, Qianyun Liu<sup>c</sup>, Xiangjun Zhang<sup>a</sup>, Hiotong Kam<sup>a</sup>, Simon M. Y. Lee<sup>a</sup>, Yu Chen<sup>\*c</sup>, Fei Deng<sup>\*b</sup>, Xi Zhou<sup>\*b,c</sup> and Ruibing Wang<sup>\*a</sup>

#### Materials and methods

**Materials.** CB[7] was synthesized and purified according to a reported method.<sup>1</sup> Chloroquine diphosphate (CQ) was purchased from TCI (Shanghai) Development Co., Ltd. Cell counting kit-8 (CCK-8) was purchased from Beyotime.

**Nuclear Magnetic Resonance (NMR) Titration.** CQ (1.0 mM) solution in D<sub>2</sub>O were used to dissolve different equivalent (eqv.) of CB[7] (0.5 eqv., 1.2 eqv. and 2.2 eqv.). <sup>1</sup>H NMR spectra was acquired by using Bruker 600 MHz NMR spectrometer.

**Job plot.** Aqueous solutions of CB[7] (0.025 mM) and CQ (0.025 mM) were separately prepared. Testing samples were prepared by mixing different volumes of CB[7] and CQ solution, with ratio of CQ/(CQ+CB[7]) ranging from 0 to 1.0 (intervals 0.1). All samples were scanned by A HACH DR6000 UV-Vis spectrometer. After collecting the absorption data of all samples, the absorption at 330 nm wavelength was selected for the analysis of  $\Delta A$ .

**Electrospray Ionization Mass Spectrometry (ESI-MS).** ESI-MS was used to study the binding ratio of the host-guest complexes. Samples were obtained from the dilution of the mixture of CQ (1.0 mM) and CB[7] (2.0 mM) solutions. The sample was sonicated and filtered before being injected into Thermo LTQ Orbitrap XL mass spectrometer.

**Isothermal Titration Calorimetry (ITC).** ITC was used to study the binding information (binding ratio and binding constant) of the host-guest complexes. In the experiment, CQ (0.1 mM) and CB[7] (2.0 mM) were separately prepared by ultrapure water and sonicated before the experiment. The titration was conducted by titrating 19 drops of CB[7] solution to CQ solution. ITC analysis was performed using MicroCal PEAQ ITC Analysis Instrument. The heat generated from CB[7] dilution was subtracted as control. The 'one set of sites' isotherm model was used to analyse the result.

**Cell viability assay.** Vero E6 and L-02 cells were separately seeded into 96 well cell culture plates at  $1 \times 10^4$  cells per well for 24 h till attachment. Then, cells were treated with different concentration of CQ and CB[7] in non-serum medium for 24 h and 48 h. Next, cells were washed and were incubated for 3 h at 37 °C in CCK-8 solution. Absorbance was tested by using Spectra Max M5 Microplate Reader at 450 nm. Cell viability data were presented by percentage relative to the control group.

**Virus.** The nCov-2019BetaCoV/Wuhan/WIV04/2019 was propagated in Vero E6 cell line. The viral titer was determined by 50% tissue culture infective dose (TCID<sub>50</sub>) using immunofluorescence assay. All the infection experiments were performed in a biosafety level-3 laboratory. MHV-A59 (GenBank accession: AY700211.1) was cultured in Vero E6 cell line. The viral titer was determined by viral plaque assay. All the infection experiments were performed in a biosafety level-3 laboratory.

**Antiviral activities.** Vero E6 cells were seeded into 24 well cell culture plates at  $5 \times 10^4$  cells per well for 24 h till attachment. Then, cells were infected with SARS-CoV-2 or MHV at a multiplicity of infection (MOI) of 0.05 for 1h with different concentrations of drugs as indicated for 1h. Next, the virus-drug supernatant was removed and the cells were washed with PBS twice, and cell culture medium with drugs as indicated were added. At 24 h post infection, the supernatant was collected for further experiment.

N2A cells were seeded into 24 well cell culture plates at  $5 \times 10^4$  cells per well for 24 h till attachment. Then, cells were infected with MHV-A59 at an MOI of 0.01 for 1h with different concentrations of drugs as indicated for 1h. Next, the virus-drug supernatant was removed and cells were washed with PBS twice, and cell culture medium with drugs as indicated were added. At 24 h post infection, the supernatant was collected for further experiment.

**Quantitative real-time PCR (qRT-PCR).** The viral RNA extraction and qRT-PCR were performed as previously described.<sup>2</sup> Cell culture supernatant was harvested for viral RNA extraction by using the MiniBEST Viral RNA/DNA Extraction Kit. RNA was eluted in 30  $\mu$ L RNase-free water. Reverse transcription was performed with a PrimeScript RT Reagent Kit with gDNA Eraser and qRT-PCR was performed on StepOne Plus Real-time PCR system with TB Green Premix Ex Taq II. Briefly, 3  $\mu$ L total RNA was first digested with gDNA eraser to remove contaminated DNA and then the first-strand cDNA was synthesized in 20  $\mu$ L reaction while 2  $\mu$ L cDNA was used as template for quantitativePCR. Receptor binding domain (RBD) of spike gene was amplified by PCR from the cDNA template with primers: RBD-F: 5'-GCTCCATGGCCTAATATTACAACTTGTGCC3'; RBD-R: 5'-TGCTCTAGACTCAAGTGTCTGTGGATCAC-3'; and cloned into pMT/BiP/V5-His vector (Invitrogen). It was used as the plasmid standard after its identity was confirmed by sequencing. A standard curve was generated by determination of copy numbers from serially dilutions (10<sup>3</sup>-10<sup>9</sup> copies) of the plasmid. The primers used for quantitative PCR were RBD-qF1: 5'-CAATGGTTTAAACAGGCACAGG-3' and RBD-qR1:5'-CTCAAGTGTCTGTGGATCACG-3. PCR amplification was performed as follows: 95 °C for 5 min followed by 40 cycles consisting of 95 °C for 15 s, 54 °C for 15 s, 72 °C for 30 s. The dose-response curves were plotted from viral RNA copies versus the drug concentrations by using Graphpad Prism 6 software.<sup>3</sup>

**Immunofluorescence microscopy.** Cells were fixed with 4% paraformaldehyde and permeabilized with 0.5% Triton X-100. Then the cells were blocked with 5% bovine serum albumin (BSA) at room temperature for 2 h. The cells were further incubated with the primary antibody (a polyclonal antibody against viral nucleocapsid protein [abbreviated as anti-NP] of a bat SARS-related CoV, 1:1000 dilution) for 2 h, followed by incubation with the secondary antibody (Alexa 488-labeled goat anti-rabbit [1:500; Abcam]). The nuclei were stained with Hoechst33258 dye (Beyotime, China). The images were taken by fluorescence microscopy.

**Viral plaque assay.** Vero E6 cells were cultured to determine viral titer. Briefly, serial 10-fold dilutions of viruses were added into monolayer cells. After adsorption at 37 °C, the virus inoculum was removed and cells were washed with PBS twice, then DMEM containing 5 % FBS and 1.0 % methylcellulose was supplemented. Plates were incubated for 2 days until obvious plaques could be observed. Cells were stained with 1% crystal violet for 4h at room temperature. Plaques were counted and viral titers were expressed as PFU/ml. The dose-response curves were plotted from viral RNA copies versus the drug concentrations by using Graphpad Prism 6 software.

## References

- 1 J. Kim, I.-S. Jung, S.-Y. Kim, et al., *J. Am. Chem. Soc.*, 122 (2000) 540-541.
- 2 Y. Han, Q. Yang, Y. Liu, et al., *Virologica Sinica*, 35 (2020) 830-832.
- 3 A. E. Gorbalenya, S. C. Baker, R. S. Baric, et al., *Nat Microbiol.* 5 (2020) 536-544.
